# Supplementary material for: Graphene oxide-mediated fluorescence turn-on GO-FAM-FRET aptasensor for detection of sterigmatocystin
Source: Royal Society of Chemistry journal article supplement (doi:10.1039/d2ay01405j), 2022-01-01
Supplement: d2ay01405j1.pdf [file d2ay01405j1.pdf]

1 **Supporting Information**

2 **Graphene oxide-mediated fluorescence turn-ON GO-FAM-FRET aptasensor**  
3 **for detection of sterigmatocystin**

4 Pravin Savata Gade,<sup>a,b</sup> Rutuja Murlidhar Sonkar<sup>a,b</sup> and Praveena Bhatt\*<sup>a,b</sup>

5

6

7

8 **Table S1: Primers and oligos used in the present study**

9

| Name           | Sequence             |   |
|----------------|----------------------|---|
| Forward primer | CTCGTCTCGTTCTCTCAGTC | 1 |
| Reverse Primer | TCCTCCTTCTTCTTCGTGTC |   |

10

11

12

13

14

15

16

17

18

19

20

21

22

23

24

25

26

27

28

29

1 **Flow cytometry analysis:**

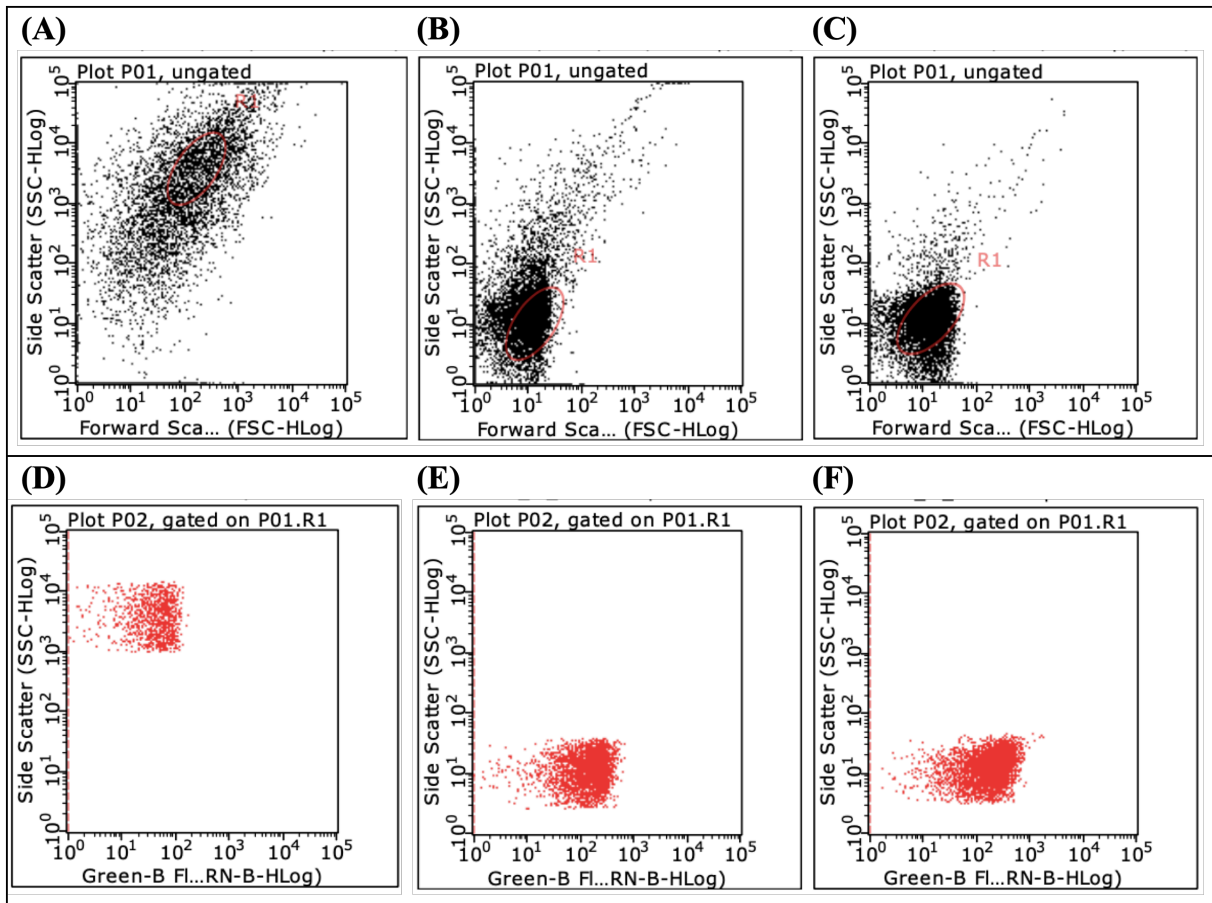

2

3 **Figure S1: Flow cytometry binding analysis of the FAM labelled aptamer and STC.** Forward and side  
4 scattering of the STC (A), MSA-C6 (B) and complex (C). The fluorescence in the green region vs side  
5 scattering of STC (D), MSA-C6 (E) and complex (F).

6

7

8

9

10

11

12

13

14

15

16

17

18

19

1 **Secondary structure prediction:**

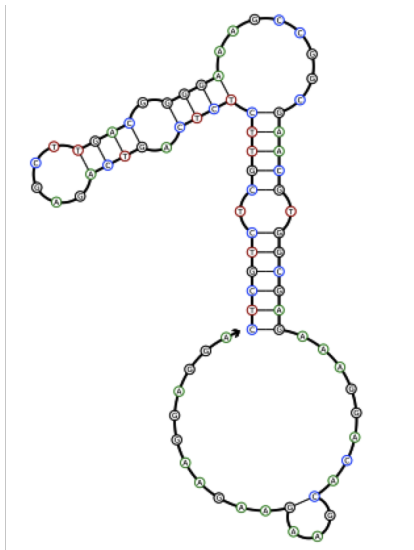

$\Delta G$  -11.8

(a)

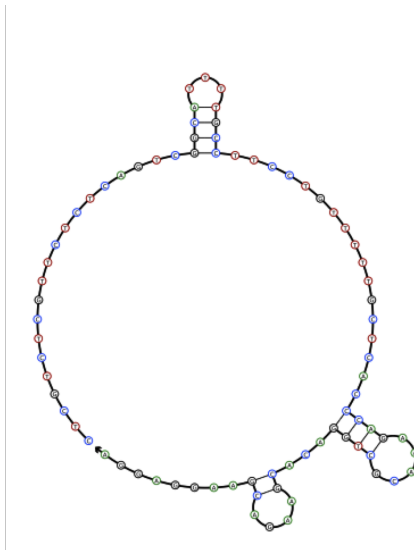

$\Delta G$  -7.9

(b)

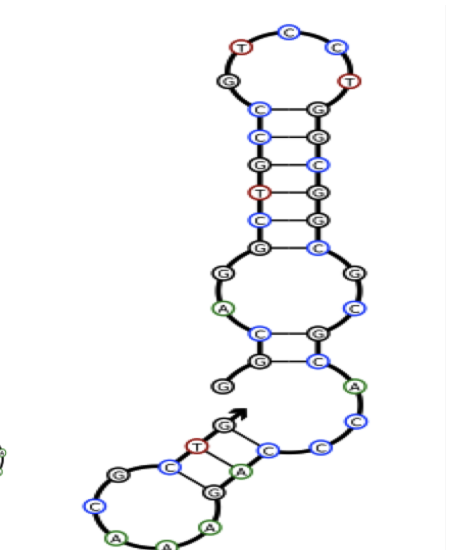

$\Delta G$  -7,68

(c)

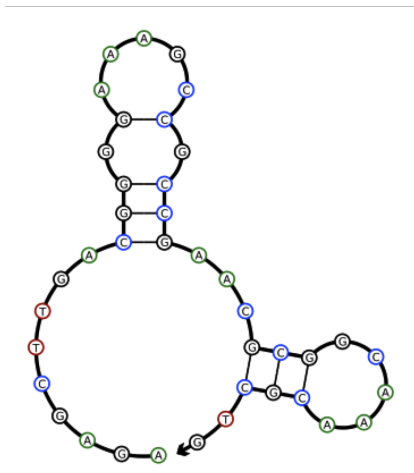

$\Delta G$  -7.48

(d)

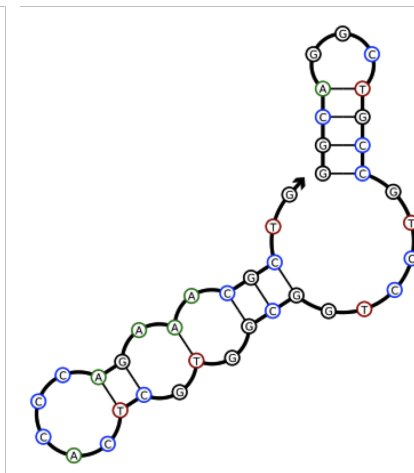

$\Delta G$  -5.55

(e)

2

3 **Figure S2: Secondary structure prediction.** Five sequences were obtained after cloning and  
4 sequencing, Homology was performed and secondary structure was predicted using the UNAFold  
5 server.

6

7

8

1 **Table S2:** Comparison of different sensors developed for Sterigmatocystin.

| Sr No | Analytical technique                                                                          | LOD         | Source                                      | References    |
|-------|-----------------------------------------------------------------------------------------------|-------------|---------------------------------------------|---------------|
| 1     | Liquid chromatography (UPLC) coupled with triple quadrupole tandem mass spectrometry (MS/MS). | 0.10 µg/kg  | Roasted coffee beans & black pepper         | <sup>2</sup>  |
| 2     | LC-MS/MS method using an immunoaffinity column                                                | 0.02 µg/kg  | wheat flour, Job's tears products, rice etc | <sup>3</sup>  |
| 3     | Competitive enzyme-linked immuno- sorbent assay (ELISA)                                       | 3 µg/kg     | Wheat, rice & maize                         | <sup>4</sup>  |
| 4     | Gas chromatography-mass spectrometry                                                          | 2.4 µg/kg   | Wheat, maize & rice                         | <sup>5</sup>  |
| 5     | HPLC-UV                                                                                       | 0.26 µg/L   | Beer                                        | <sup>6</sup>  |
| 6     | Fluorescence sensor based on carbon dots-embedded molecularly imprinted polymer               | 0.019 mg/L  | Millet, Rice and Maize                      | <sup>7</sup>  |
| 7     | Fluorescence sensor based on Molecularly Imprinted Fluorescent Polymers                       | 0.013 mg/L  | Rice, Maize and Soybeans                    | <sup>8</sup>  |
| 8     | GO-FAM-FRET fluorescence turn-ON aptasensor                                                   | 23.56 ng/mL | Chilli & Pepper                             | Present study |

2

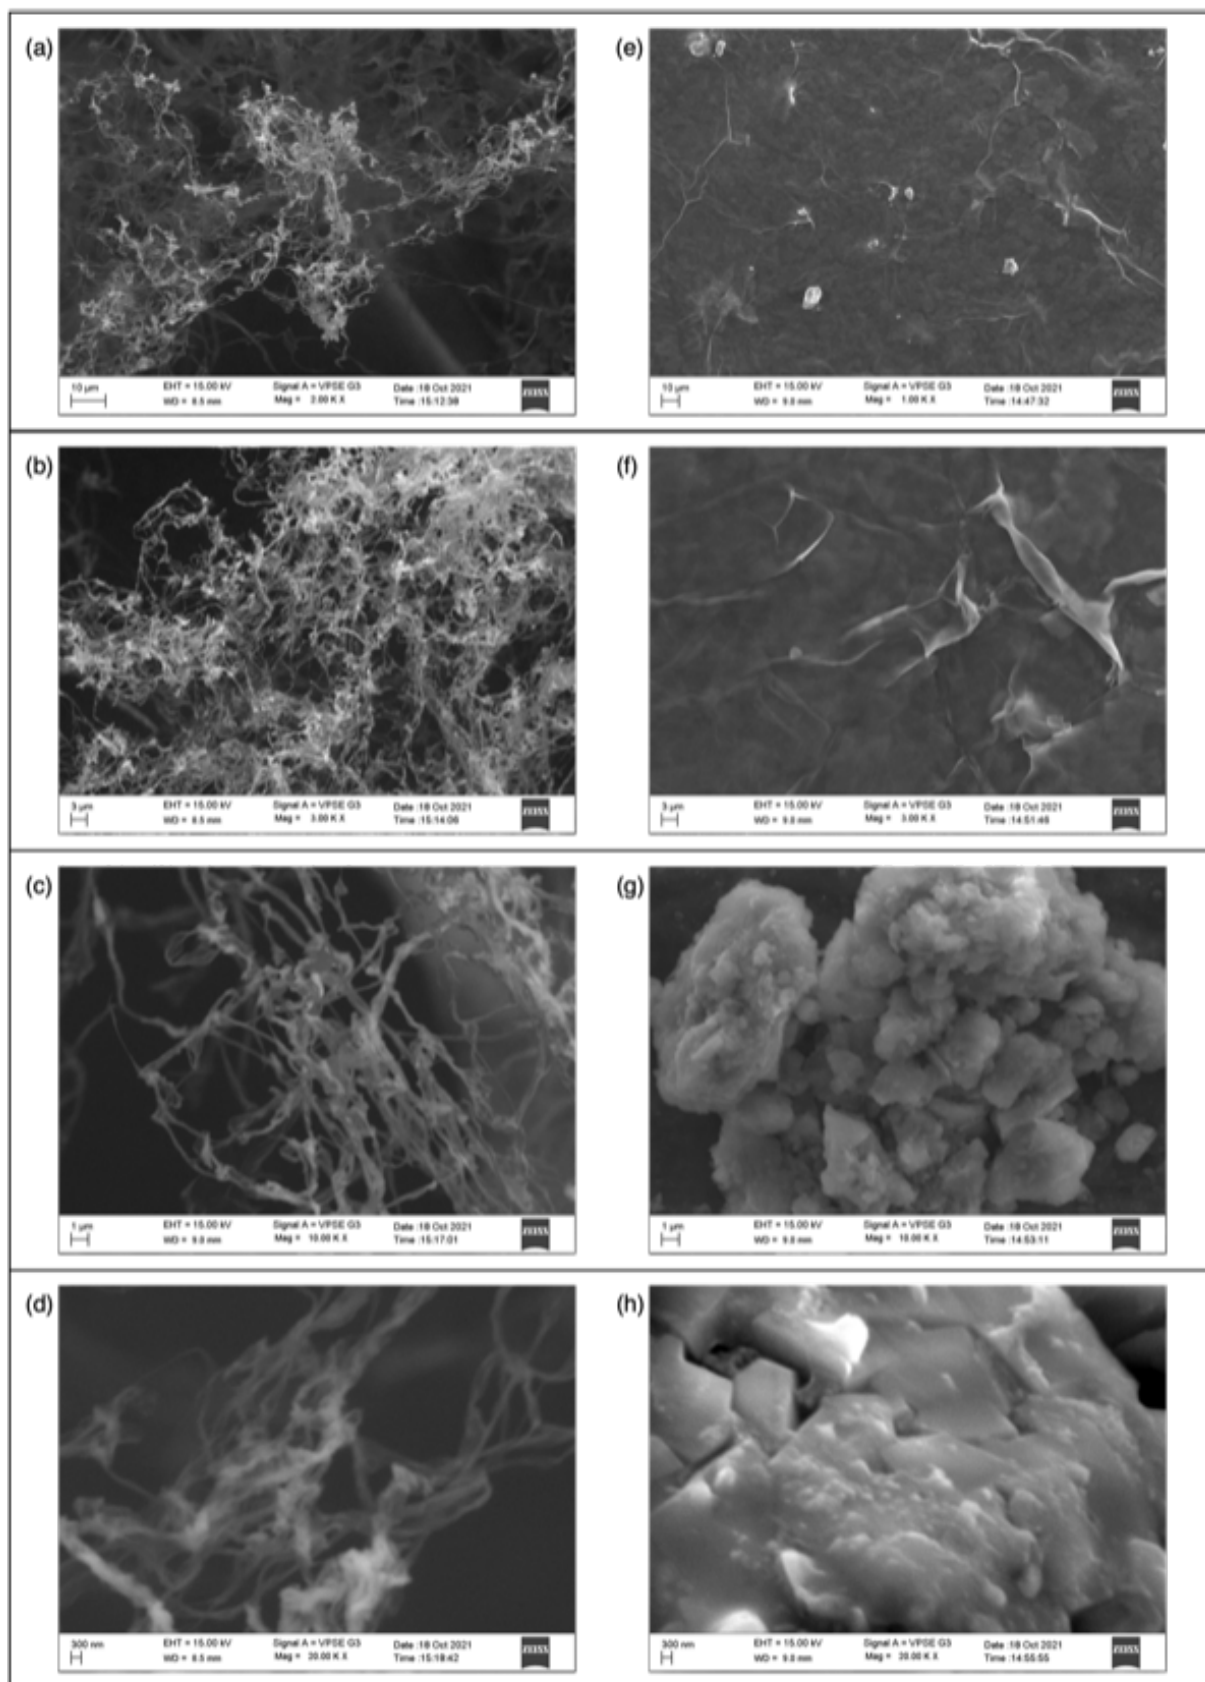

1 **Figure S3: Characterisation of GO and GO coated surface by SEM. (a-d)** SEM images of GO at different  
2 resolutions and **(e-h)** SEM images of GO coated surface at a different resolution.

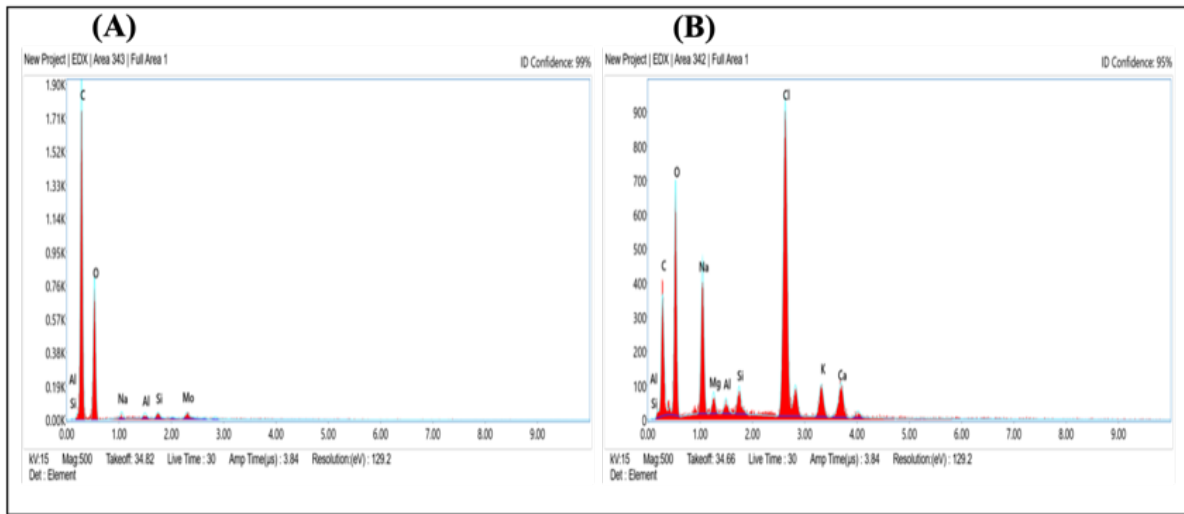

3  
4 **Figure S4: Characterisation of GO and GO-coated surface by EDAX. (A)** EDAX analysis of GO and **(B)**  
5 EDAX analysis of GO-coated surface.

6  
7

8 **GO coating concentration optimization for F-MSA-C6**

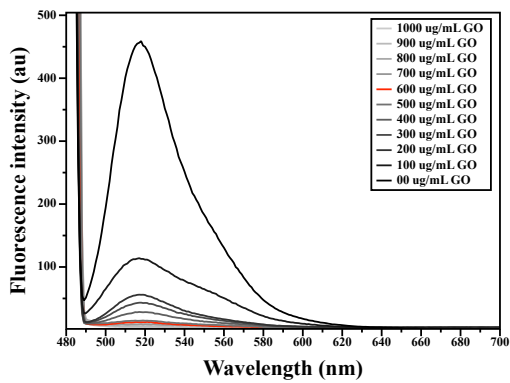

9  
10 **Figure S5: The GO concentration optimization to coat the PP surface to efficiently adsorb F-MSA-C6.**

11  
12

1 **Assay Validation and cross-validation:**

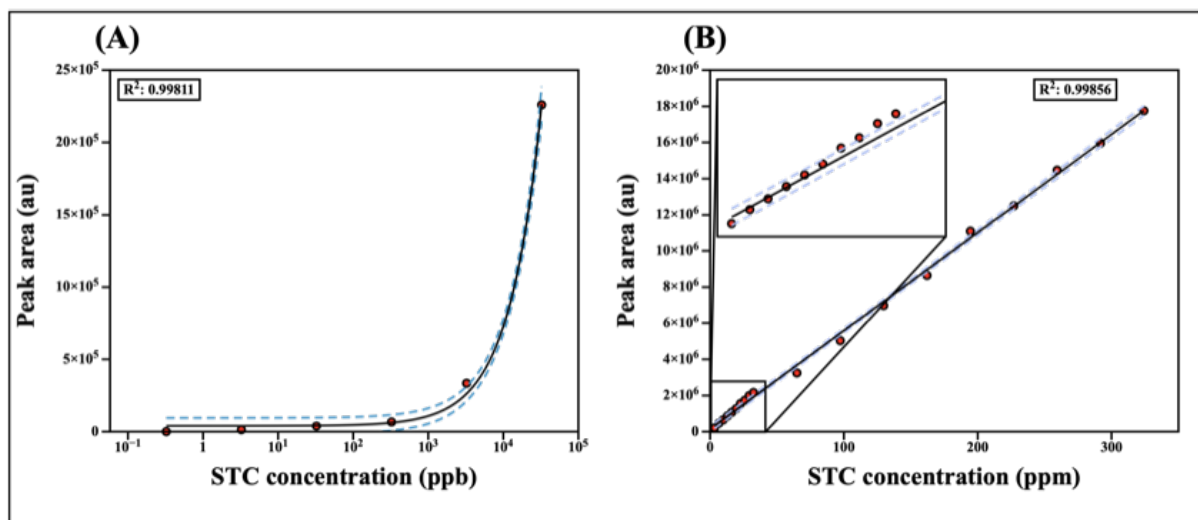

2  
3 **Figure S6: Assay validation and cross-validation. (a and b)** calibration curve of STC HPLC analysis (n=2).

4  
5  
6 **Table S3:** Precision studies in simulated contaminated samples using developed GO-FAM-FRET  
7 aptasensor.

| STC concentration<br>(ppb) | Intraday |      |        | Interday |      |        |      |
|----------------------------|----------|------|--------|----------|------|--------|------|
|                            | Mean *   | SD   | CV (%) | Mean *   | SD   | CV (%) |      |
| Pepper                     | 32.42    | 34.1 | 1.41   | 1.99     | 32.6 | 1.78   | 3.15 |
|                            | 324.3    | 323  | 2.83   | 7.98     | 329  | 4.51   | 20.3 |
| Chili                      | 32.42    | 34.3 | 1.36   | 1.84     | 35.4 | 2.01   | 4.03 |
|                            | 324.3    | 329  | 2.06   | 4.23     | 333  | 2.08   | 9.49 |

8 \* Mean of three replicates

9

10

11

1 **References**

- 2 1 K. Setlem, B. Mondal, S. Ramlal and J. Kingston, *Frontiers in Microbiology*, 2016, **7**,  
3 1–14.
- 4 2 S. W. C. Chung and A. H. T. Wu, *Food Additives and Contaminants - Part A*  
5 *Chemistry, Analysis, Control, Exposure and Risk Assessment*, 2020, **37**, 355–362.
- 6 3 T. Yoshinari, H. Takeuchi, M. Kosugi, M. Taniguchi, M. Waki, S. Hashiguchi, T.  
7 Fujiyoshi, Y. Shichinohe, M. Nakajima, T. Ohnishi, Y. Hara-Kudo and Y. Sugita-  
8 Konishi, *Food Additives and Contaminants - Part A Chemistry, Analysis, Control,*  
9 *Exposure and Risk Assessment*, 2019, **36**, 1404–1410.
- 10 4 M. Oplatowska-Stachowiak, C. Reiring, N. Sajic, W. Haasnoot, C. Brabet, K.  
11 Campbell, C. T. Elliott and M. Salden, *Analytical and Bioanalytical Chemistry*, 2018,  
12 **410**, 3017–3023.
- 13 5 M. Z. Hossain and T. Goto, *Mycotoxin Research*, 2015, **31**, 17–22.
- 14 6 A. Veršilovskis, S. De Saeger and V. Mikelsone, *World Mycotoxin Journal*, 2008, **1**,  
15 161–166.
- 16 7 L. Xu, G. Fang, M. Pan, X. Wang and S. Wang, *Biosensors and Bioelectronics*, 2016,  
17 **77**, 950–956.
- 18 8 J. M. Liu, F. Z. Cao, G. Z. Fang and S. Wang, *Polymers (Basel)*, ,  
19 DOI:10.3390/polym9070299.  
20
